# Supplementary material for: Characterizing COVID-19 clinical phenotypes and associated comorbidities and complication profiles
Source: PubMed Central journal article supplement (PMC8011766; doi:10.1371/journal.pone.0248956), 2021-03-31
Supplement: pone.0248956.s010.pdf [file pone.0248956.s010.pdf]

**S1 Table.** Categories of Comorbidities and ICD 10 Codes used

| <b>Category</b>            | <b>Diagnosis</b>                                   |
|----------------------------|----------------------------------------------------|
| <b>Cardiac</b>             | Hypertension                                       |
|                            | Coronary Artery Disease                            |
|                            | Heart Failure with preserved ejection fraction     |
|                            | Systolic heart failure                             |
|                            | Acute myocardial infarction                        |
|                            | Unspecified heart failure                          |
|                            | Heart Valve                                        |
|                            | Pacemaker                                          |
|                            | Automatic Implantable Cardioverter Defibrillator   |
|                            | Ventricular assist device                          |
|                            | Pulmonary hypertension                             |
|                            | Heart Transplant                                   |
|                            | Atrial fibrillation / Atrial Flutter               |
|                            | Ventricular tachycardia / Ventricular fibrillation |
|                            | Supraventricular tachycardia                       |
| Cardiac arrest             |                                                    |
| <b>Respiratory</b>         | Active Smoker                                      |
|                            | Chronic obstructive lung disease                   |
|                            | Interstitial lung disease                          |
|                            | Asthma                                             |
|                            | Bronchiectasis                                     |
| Lung transplant            |                                                    |
| <b>Hematological</b>       | Venous thromboembolism                             |
|                            | Hypercoagulable state                              |
|                            | Lupus Anticoagulant                                |
|                            | Heparin induced thrombocytopenia                   |
|                            | Disseminated intravascular coagulopathy            |
|                            | Hypocoagulable state                               |
|                            | Idiopathic thrombocytopenia                        |
|                            | Hemophagocytic lymphohistiocytosis                 |
|                            | Sickle Cell disorder                               |
| Thalassemia                |                                                    |
| <b>Oncologic</b>           | Any Cancer ICD10 code                              |
| <b>Metabolic/Endocrine</b> | Non-alcoholic fatty liver disease                  |
|                            | Non-alcoholic steatohepatitis                      |
|                            | Obesity                                            |
|                            | Overweight                                         |
|                            | Metabolic Syndrome                                 |
|                            | Osteoporosis                                       |
|                            | Sleep Apnea                                        |
|                            | Prior Bariatric Surgery                            |
| Type 2 diabetes mellitus   |                                                    |

|                        |                                                                                                                                    |
|------------------------|------------------------------------------------------------------------------------------------------------------------------------|
| <b>Renal</b>           | Chronic kidney disease (any stage)                                                                                                 |
|                        | End stage renal disease                                                                                                            |
|                        | Kidney transplant                                                                                                                  |
| <b>Hepatic</b>         | Liver transplant                                                                                                                   |
|                        | Any Liver Disease                                                                                                                  |
| <b>Autoimmune</b>      | Type 1 diabetes mellitus                                                                                                           |
|                        | Neutropenia                                                                                                                        |
|                        | Any Autoimmune disease                                                                                                             |
|                        | Inflammatory bowel disease                                                                                                         |
|                        | Lupus                                                                                                                              |
|                        | Rheumatoid Arthritis                                                                                                               |
| <b>Comorbidity</b>     |                                                                                                                                    |
| <b>Comorbidity</b>     | <b>ICD10 Codes</b>                                                                                                                 |
| Hypertension           | R03.0, I10, I16.0, I11.0, I15.2, I12.9, I11.0                                                                                      |
| T1DM                   | E10.21, Z96.41, E10.8, E10.9, E10.10, E10.65, E10.9, E10.641, E10.40, E10.22, E10.69, E10.649, E10.*                               |
| T2DM                   | E11.*                                                                                                                              |
| Tobacco                | Z71.6, Z72.0                                                                                                                       |
| CAD                    | I25.*                                                                                                                              |
| HFpEF                  | I50.30, I50.31, I50.32, I50.33                                                                                                     |
| Systolic HF            | I50.20, I50.21, I50.22, I50.23, I50.40, I50.41, I50.42, I50.43                                                                     |
| Any Liver Disease      | K70.*, K71.*, K72.*, K73.*, K74.*, K75.*, K76.*, K77.*                                                                             |
| NAFLD                  | K76.0                                                                                                                              |
| NASH                   | K75.81, K75.8                                                                                                                      |
| Class 2 Obese          | Z68.35, Z68.36, Z68.37, Z68.38, Z68.39                                                                                             |
| Any Obese              | E66                                                                                                                                |
| Overweight             | E66.3, Z68.25, Z68.26, Z68.27, Z68.28, Z68.29                                                                                      |
| Class 1 Obese          | Z68.30, Z68.31, Z68.32, Z68.33, Z68.34                                                                                             |
| Class 3 Obese          | E66.01*, E66.2*, Z68.4**                                                                                                           |
| History of VTE         | I27.82, Z86.711, Z86.718, I82*                                                                                                     |
| Neutropenia            | D70*                                                                                                                               |
| Hypercoagulable state  | D68.5*, D68.6*                                                                                                                     |
| HIT                    | D75.82                                                                                                                             |
| DIC                    | D65*                                                                                                                               |
| Hypocoagulable state   | D68.0*, D68.1*, D68.2*, D68.3*, D68.4*, D68.8*, D68.9*, D69.0*, D69.1*, D69.2*, D69.4*, D69.5*, D69.6*, D69.8*, D69.9*, D66*, D67* |
| ITP                    | D69.3*                                                                                                                             |
| HLH                    | D76                                                                                                                                |
| Methemoglobinemia      | D74*                                                                                                                               |
| Any Autoimmune Disease | M30*, D86*, D89*, I73.00, I73.01, K75.4, M32*, M34.9, M34.8, M35*, M06*, M45.9, M35.3, K51*                                        |

|                              |                                                    |
|------------------------------|----------------------------------------------------|
| Acute MI                     | I21.*                                              |
| Any Heart Failure            | I50*                                               |
| COPD                         | J44*, J41*, J43*                                   |
| ILD                          | J84*                                               |
| Any asthma                   | J45                                                |
| Mild intermittent asthma     | J45.2*                                             |
| Mild persistent asthma       | J45.3*                                             |
| Moderate persistent asthma   | J45.4*                                             |
| Severe asthma                | J45.5*                                             |
| Bronchiectasis               | J47*                                               |
| Sickle cell                  | D57*                                               |
| Thalassemia                  | D56*                                               |
| Prosthetic Heart Valve       | Z95.2*                                             |
| Xeno Heart Valve             | Z95.3*                                             |
| Pacemaker AICD/VAD           | Z95.0*, Z95.81*                                    |
| Pulmonary Hypertension       | I27.2*, I27.0*, I27.81, I27.83                     |
| Any CKD                      | N18*                                               |
| Stage 1 CKD                  | N18.1*                                             |
| Stage 2 CKD                  | N18.2*                                             |
| Stage 3 CKD                  | N18.3*                                             |
| Stage 4 CKD                  | N18.4*                                             |
| Stage 5 CKD                  | N18.5*                                             |
| ESRD                         | N18.6*, Z99.2*, T85.631*                           |
| Kidney Transplant            | Z94.0*                                             |
| Liver Transplant             | Z94.4*                                             |
| Lung Transplant              | Z94.2*                                             |
| Heart Transplant             | Z94.1*                                             |
| Pancreas Transplant          | Z94.83*                                            |
| Afib flutter                 | I48*                                               |
| VTach VFib                   | I47.0*, I47.2*, I49.0*                             |
| Supraventricular Tachycardia | I47.1*                                             |
| Prior Cardiac Arrest         | I46*                                               |
| Cerebrovascular Disease      | G45.*, G46.*, H34.0, I6*.*, I97.81*, I97.82*       |
| Osteoporosis                 | M81*                                               |
| Ethanol Abuse                | F10*, K70*, G62.1*, I42.7*, K29.2*, O35.4*, O99.31 |
| HIV                          | B20*, B97.35*, R75*, Z21*                          |
| Avian Swine Flu              | J09*                                               |
| IBD                          | K50*, K51*                                         |
| Sleep Apnea                  | G47.3*                                             |
| Lupus                        | L93*, M32*                                         |
| Rheumatoid Arthritis         | M06*, M05*                                         |
| Any Cancer                   | C**.*, C44.*                                       |
| Breast Cancer                | C50*                                               |
| Lung Cancer                  | C34.1*, C34.2*, C34.3*, C34.8*, C34.9*             |

|                            |         |
|----------------------------|---------|
| Metabolic Syndrome         | E88.81* |
| Previous Bariatric Surgery | Z98.84* |

*Abbreviations: T1DM: Type 1 diabetes mellitus, T2DM Type 2 diabetes mellitus, HFpEF: heart failure with preserved ejection fraction, HF: heart failure, CAD: coronary artery disease, NAFLD: non-alcoholic fatty liver disease, NASH: non-alcoholic steatohepatitis, VTE: venous thromboembolism, HIT: heparin induced thrombocytopenia, DIC: disseminated intravascular coagulation, ITP: idiopathic thrombocytopenia, HLH: hemophagocytic lymphohistiocytosis, MI: myocardial infarction, COPD: chronic obstructive lung disease, ILD: interstitial lung disease, AICD: Automatic Implantable Cardioverter Defibrillator, VAD: ventricular assist device, CKD: chronic kidney disease, ESRD: end stage renal disease, Afib: atrial fibrillation, HIV: human immunodeficiency virus, Flu: influenza, IBD: inflammatory bowel disease.*
