# Supplementary material for: Characterizing COVID-19 clinical phenotypes and associated comorbidities and complication profiles
Source: PubMed Central journal article supplement (PMC8011766; doi:10.1371/journal.pone.0248956), 2021-03-31
Supplement: pone.0248956.s012.pdf [file pone.0248956.s012.pdf]

**S3 Table 3:** Association of Clinical Phenotype with In-Hospital Complications

| <b>Complications*</b> | <b>OR</b> | <b>95% CI</b> | <b>P value</b>   |
|-----------------------|-----------|---------------|------------------|
| <b>Cardiovascular</b> |           |               | 0.93 (LR test)   |
| Phenotype I           | 0.90      | 0.42 – 1.91   | 0.78             |
| Phenotype II          | 1.00      | 0.53 – 1.89   | 1.00             |
| <b>Respiratory</b>    |           |               | <0.001 (LR test) |
| Phenotype I           | 2.98      | 1.58 – 5.59   | <0.001           |
| Phenotype II          | 2.32      | 1.29 – 4.17   | 0.01             |
| <b>Hematologic</b>    |           |               | 0.02 (LR test)   |
| Phenotype I           | 2.11      | 0.99 – 4.48   | 0.05             |
| Phenotype II          | 0.99      | 0.48 – 2.04   | 0.97             |
| <b>Renal</b>          |           |               | <0.001 (LR test) |
| Phenotype I           | 7.04      | 3.11 – 15.9   | <0.001           |
| Phenotype II          | 2.57      | 1.15 – 5.74   | 0.02             |
| <b>Hepatic</b>        |           |               | <0.001 (LR test) |
| Phenotype I           | 8.35      | 1.93 – 36.11  | <0.001           |
| Phenotype II          | 0.56      | 0.1 – 3.09    | 0.51             |
| <b>Metabolic</b>      |           |               | <0.001 (LR test) |
| Phenotype I           | 4.85      | 2.78 – 8.45   | <0.001           |
| Phenotype II          | 2.57      | 1.52 – 4.34   | <0.001           |
| <b>Infectious</b>     |           |               | <0.001 (LR test) |
| Phenotype I           | 2.57      | 1.57 – 4.21   | <0.001           |
| Phenotype II          | 1.51      | 0.96 – 2.38   | 0.07             |

Abbreviations: OR, odds ratio; CI, confidence interval; LR, likelihood ratio

\* Reference group for all models is Phenotype III. All models adjusted for sex, race/ethnicity, and Elixhauser Comorbidity Index.
