# Supplementary material for: Characterizing COVID-19 clinical phenotypes and associated comorbidities and complication profiles
Source: PubMed Central journal article supplement (PMC8011766; doi:10.1371/journal.pone.0248956), 2021-03-31
Supplement: pone.0248956.s013.pdf [file pone.0248956.s013.pdf]

|                                     | <b>LOS IRR with in-hospital death included</b> | <b>LOS IRR with in-hospital death excluded</b> |
|-------------------------------------|------------------------------------------------|------------------------------------------------|
| <b>Cluster 1 (vs ref Cluster 3)</b> | 1.68 (95% CI 1.41-2.01)                        | 1.74 (95% CI 1.45-2.1)                         |
| <b>Cluster 2 (vs ref Cluster 3)</b> | 1.23 (95% CI 1.07-1.44)                        | 1.22 (95% CI 1.05-1.43)                        |

IRR = incidence rate ratio; LOS = length of stay

Sensitivity analysis to evaluate the impact of in-hospital mortality on hospital length of stay (LOS). Negative binomial regression was used in this analysis. No difference was noted in length of stay with or without accounting for in-hospital mortality.
