# Supplementary material for: Characterizing COVID-19 clinical phenotypes and associated comorbidities and complication profiles
Source: PubMed Central journal article supplement (PMC8011766; doi:10.1371/journal.pone.0248956), 2021-03-31
Supplement: pone.0248956.s014.pdf [file pone.0248956.s014.pdf]

**S5 Table:** Home medications and hospital day 5 laboratory values of hospitalized COVID-19 patients with clinical phenotypes I, II, and III.

|                             | <b>Phenotype I</b>   | <b>Phenotype II</b>  | <b>Phenotype III</b> | <b>P value</b> |
|-----------------------------|----------------------|----------------------|----------------------|----------------|
|                             | N=236                | N=613                | N=173                |                |
| <b>Home Medications*</b>    |                      |                      |                      |                |
| Warfarin                    | 29.5 (8.9)           | 30.8 (8.2)           | 30.4 (13.4)          | 0.21           |
| Montelukast                 | 9 ( 3.8%)            | 47 ( 7.7%)           | 17 ( 9.8%)           | 0.05           |
| Inhaled Ipratropium         | 2 ( 0.8%)            | 29 ( 4.7%)           | 6 ( 3.5%)            | 0.03           |
| Digoxin                     | 13 ( 5.5%)           | 43 ( 7.0%)           | 15 ( 8.7%)           | 0.46           |
| Oral Steroids               | 2 ( 0.8%)            | 6 ( 1.0%)            | 3 ( 1.7%)            | 0.65           |
| Proton Pump Inhibitor       | 30 (12.7%)           | 108 (17.6%)          | 37 (21.4%)           | 0.06           |
| Clopidogrel                 | 57 (24.2%)           | 181 (29.5%)          | 44 (25.4%)           | 0.23           |
| Inhaled Steroids            | 9 ( 3.8%)            | 19 ( 3.1%)           | 8 ( 4.6%)            | 0.61           |
| Nasal Fluticasone           | 17 ( 7.2%)           | 79 (12.9%)           | 26 (15.0%)           | 0.03           |
| Aspirin                     | 19 ( 8.1%)           | 87 (14.2%)           | 34 (19.7%)           | 0.003          |
| Amiodarone                  | 3 ( 1.3%)            | 6 ( 1.0%)            | 4 ( 2.3%)            | 0.38           |
| Albuterol                   | 71 (30.1%)           | 182 (29.7%)          | 55 (31.8%)           | 0.87           |
| Loop Diuretic†              | 1 ( 0.4%)            | 5 ( 0.8%)            | 4 ( 2.3%)            | 0.13           |
| Antihistamine               | 34 (14.4%)           | 146 (23.8%)          | 46 (26.6%)           | 0.004          |
| Statin                      | 38 (16.1%)           | 106 (17.3%)          | 25 (14.5%)           | 0.66           |
| Metformin                   | 12 ( 5.1%)           | 71 (11.6%)           | 22 (12.7%)           | 0.01           |
| ACE inhibitor               | 81 (34.3%)           | 221 (36.1%)          | 60 (34.7%)           | 0.87           |
| ARB                         | 16 ( 6.8%)           | 50 ( 8.2%)           | 16 ( 9.2%)           | 0.65           |
| <b>Hospital Day 5 Labs*</b> |                      |                      |                      |                |
| <b>Hematologic</b>          |                      |                      |                      |                |
| PLT                         | 264.0 (188.0-342.0)  | 255.5 (184.0-342.0)  | 210.0 (159.0-264.0)  | 0.002          |
| PTT                         | 40.0 (32.0-65.0)     | 33.5 (30.0-42.5)     | 32.5 (31.0-40.5)     | 0.02           |
| Fibrinogen                  | 503.5 (422.0-648.0)  | 565.0 (470.0-684.0)  | 476.0 (418.0-573.0)  | 0.01           |
| D-Dimer                     | 3.1 (1.9-6.1)        | 1.1 (0.6-1.9)        | 0.8 (0.4-1.3)        | <0.001         |
| Hematocrit                  | 33.1 (28.5-36.7)     | 36.4 (32.9-40.3)     | 36.3 (32.2-40.7)     | <0.001         |
| <b>Inflammatory</b>         |                      |                      |                      |                |
| CRP                         | 76.5 (29.0-173.0)    | 54.0 (19.0-134.5)    | 20.0 (5.0-46.0)      | <0.001         |
| ESR                         | 29.0 (28.0-48.0)     | 76.5 (41.0-113.0)    | 52.0 (2.0-102.0)     | 0.31           |
| IL-6                        | 190.5 (62.4-749.0)   | 62.6 (20.7-472.0)    | 31.1 (6.9-264.1)     | 0.09           |
| IL-8                        | 54.3 (39.6-163.5)    | 56.1 (36.3-112.0)    | 24.3 (8.1-40.4)      | 0.18           |
| TNF alpha                   | 26.8 (21.5-36.7)     | 33.5 (17.8-40.6)     | 16.7 (7.2-26.2)      | 0.36           |
| IL-1B                       | 0.8 (0.4-1.4)        | 0.8 (0.3-1.3)        | 0.3 (0.0-0.7)        | 0.40           |
| LDH                         | 390.5 (318.0-519.0)  | 338.0 (263.0-436.0)  | 263.0 (182.0-331.0)  | <0.001         |
| Ferritin                    | 774.0 (490.0-2165.0) | 637.5 (256.0-1757.5) | 330.0 (162.0-870.5)  | 0.01           |
| <b>Cardiovascular</b>       |                      |                      |                      |                |
| EKG QTc                     | 382.0 (342.0-420.0)  | 371.0 (348.0-404.0)  | 349.0 (304.0-418.0)  | 0.52           |
| Pro-BNP                     | 89.0 (25.0-434.0)    | 167.0 (52.0-365.0)   | 507.0 (55.5-1083.5)  | 0.62           |
| Lactate                     | 1.3 (1.0-1.8)        | 1.2 (0.9-1.7)        | 1.6 (0.9-2.1)        | 0.41           |
| <b>Other</b>                |                      |                      |                      |                |
| AST                         | 44.0 (28.0-75.0)     | 40.0 (28.0-59.0)     | 27.0 (17.0-41.0)     | 0.002          |
| Bicarbonate                 | 26.0 (23.0-28.0)     | 25.0 (23.0-27.0)     | 26.0 (24.0-29.5)     | 0.01           |

|                 |                     |                     |                    |        |
|-----------------|---------------------|---------------------|--------------------|--------|
| Procalcitonin   | 0.6 (0.2-1.4)       | 0.3 (0.1-0.7)       | 0.1 (0.1-0.2)      | <0.001 |
| Albumin         | 2.0 (1.7-2.5)       | 2.5 (2.1-2.8)       | 3.0 (2.5-3.4)      | <0.001 |
| Total Bilirubin | 0.6 (0.4-0.9)       | 0.5 (0.3-0.7)       | 0.5 (0.3-0.6)      | 0.005  |
| Triglyceride    | 210.0 (151.0-297.0) | 184.0 (128.0-341.0) | 53.0 (17.0-79.0)   | 0.02   |
| Glucose         | 134.0 (107.0-176.0) | 122.0 (98.0-157.0)  | 106.5 (94.0-132.0) | <0.001 |
| Creatinine      | 0.9 (0.7-1.6)       | 0.8 (0.7-1.2)       | 0.8 (0.7-1.0)      | 0.03   |
| WBC             | 9.2 (7.3-12.1)      | 7.1 (5.3-9.4)       | 5.8 (4.7-7.4)      | <0.001 |
| ANC             | 8.1 (5.6-10.4)      | 5.6 (3.8-7.7)       | 3.9 (2.1-5.6)      | <0.001 |
| ALC             | 1.0 (0.6-1.5)       | 1.0 (0.7-1.6)       | 1.3 (0.9-1.8)      | 0.019  |

\* Categorical variables presented as count (%), continuous variables presented as median (interquartile range).

† Loop Diuretics include furosemide, torsemide, bumetanide.

Abbreviations: ALC, Absolute Lymphocyte Count; ANC, Absolute Neutrophil Count; ARB, Angiotensin receptor blocker; AST, Aspartate transaminase; CRP, C-Reactive Protein; ESR, Erythrocyte Sedimentation Rate; EKG, Electrocardiogram; IL, Interleukin; LDH, Lactate Dehydrogenase; Pro-BNP, proB-type Natriuretic Peptide; PLT, Platelets; PTT, Partial Thromboplastin Time; TNF-alpha, Tumor Necrosis Factor-alpha; WBC, White Blood Cell;
