# Supplementary material for: Characterizing COVID-19 clinical phenotypes and associated comorbidities and complication profiles
Source: PLoS One. 2021 Mar 31;16(3):e0248956. doi: 10.1371/journal.pone.0248956 (PMC8011766; doi:10.1371/journal.pone.0248956)
Supplement: S2 Table — (PDF) [file pone.0248956.s011.pdf]

**S2 Table:** List of Complications contributing to each Complication category.

| Category       | Complication                                                                      |
|----------------|-----------------------------------------------------------------------------------|
| Cardiovascular | Hypotension (sustained SBP < 90)                                                  |
|                | Atrial fibrillation                                                               |
|                | Acute Heart Failure                                                               |
|                | Myocardial infarction                                                             |
|                | BNP (BNP > 450 after initial 48 hours of admission)                               |
|                | Troponemia (Troponin > 0.5 after initial 48 hours of admission)                   |
| Respiratory    | Pneumothorax                                                                      |
|                | Pulmonary Edema                                                                   |
|                | Acute respiratory distress syndrome                                               |
|                | Respiratory Failure                                                               |
|                | Healthcare associated pneumonia                                                   |
|                | Ventilator associated pneumonia                                                   |
| Hematologic    | In-hospital bleeding event                                                        |
|                | Cerebrovascular accident                                                          |
|                | Myocardial infarction                                                             |
|                | Pulmonary embolism                                                                |
|                | Deep venous thrombosis                                                            |
|                | Severe Anemia (Hgb < 6)                                                           |
| Renal          | Urinary tract infection                                                           |
|                | Acute Renal Failure                                                               |
|                | 1.0 point increase in creatinine from baseline after initial 48 hours in hospital |
| Metabolic      | Rhabdomyolysis                                                                    |
|                | Malnutrition                                                                      |
|                | Hypernatremia (>149)                                                              |
|                | Hyperkalemia (>5)                                                                 |
|                | Hypoglycemia (< 60)                                                               |
|                | Hyperglycemia (> 180)                                                             |
| Hepatic        | AST > 200 after initial 48 hours                                                  |
|                | Total bilirubin > 3 after initial 48 hours                                        |
| Infectious     | Bacteremia                                                                        |
|                | Clostridium difficile infection                                                   |
|                | Sepsis                                                                            |
|                | Urinary tract infection                                                           |
|                | Healthcare associated pneumonia                                                   |
|                | Ventilator associated pneumonia                                                   |
|                |                                                                                   |

Abbreviations: SBP: systolic blood pressure, BNP: beta natriuretic peptide, Hgb: hemoglobin, AST: aspartate transaminase.
